# Supplementary material for: Levofloxacin‐Induced QTc Prolongation Depends on the Time of Drug Administration
Source: PubMed Central journal article supplement — CPT Pharmacometrics Syst Pharmacol. 2016 Aug 1;5(9):466–74. doi: 10.1002/psp4.12085 (PMC5036421; doi:10.1002/psp4.12085), 2016-08-01
Supplement: PSP4-5-466-s001.pdf [file PSP4-5-466-s001.pdf]

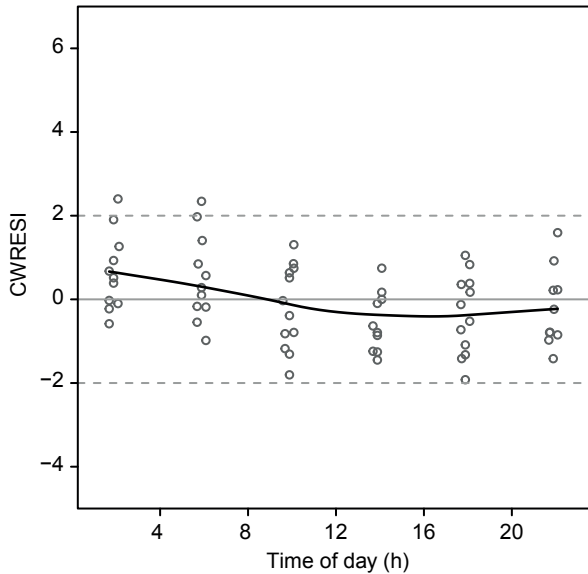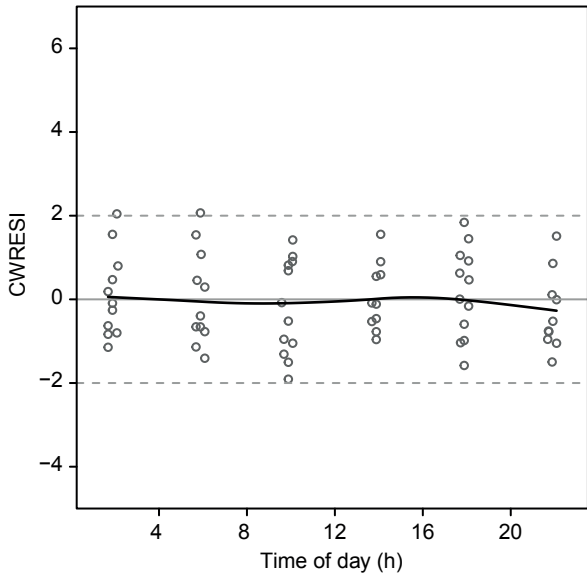

**Supplemental Fig 1** Conditional weighted residuals with interaction (CWRESI) of baseline model without (left) and with (right) correction for 24-hour rhythm in the QT interval.
