# Supplementary material for: Levofloxacin‐Induced QTc Prolongation Depends on the Time of Drug Administration
Source: PubMed Central journal article supplement — CPT Pharmacometrics Syst Pharmacol. 2016 Aug 1;5(9):466–74. doi: 10.1002/psp4.12085 (PMC5036421; doi:10.1002/psp4.12085), 2016-08-01
Supplement: PSP4-5-466-s002.pdf [file PSP4-5-466-s002.pdf]

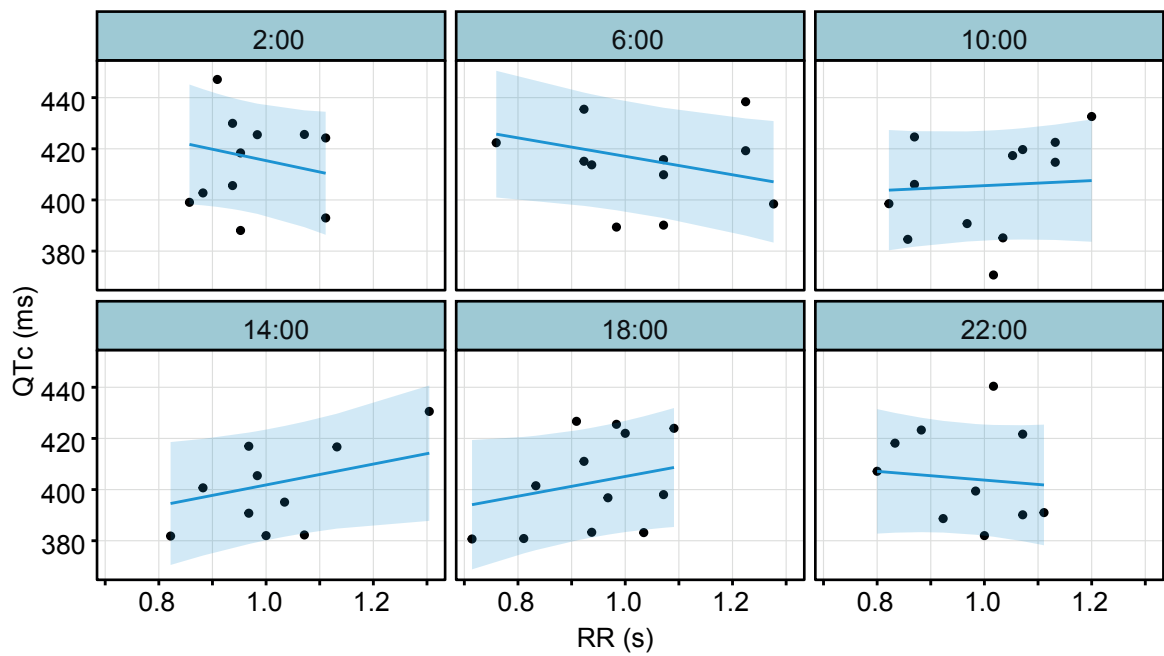

**Supplemental Figure 2** The relationship between the RR interval and the QTc interval in the baseline recordings split by time of day. The QT interval was corrected by the study-specific  $\alpha$  obtained from the baseline model ( $\alpha=0.216$ ). A linear mixed effect with QTc as the dependent variable, RR as the fixed effect, dosing time as a categorical variable, interaction between RR and dosing time and subject as a random effect shows that the interaction between RR and dosing time ( $p=0.1617$ ) and the effect of RR on QTc ( $p=0.5706$ ) are not significant. Solid lines: predicted slopes of the model. Shaded areas: 95% prediction intervals.
