# Supplementary material for: Levofloxacin‐Induced QTc Prolongation Depends on the Time of Drug Administration
Source: PubMed Central journal article supplement — CPT Pharmacometrics Syst Pharmacol. 2016 Aug 1;5(9):466–74. doi: 10.1002/psp4.12085 (PMC5036421; doi:10.1002/psp4.12085), 2016-08-01
Supplement: PSP4-5-466-s003.pdf [file PSP4-5-466-s003.pdf]

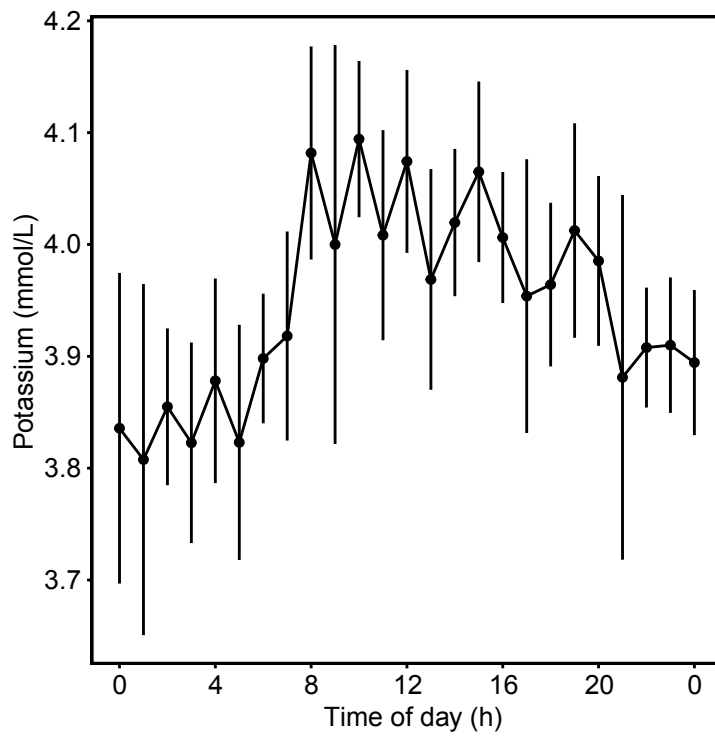

**Supplemental Figure 3** Mean concentrations of potassium in plasma. Sampling times were rounded to the nearest hour. Error bars represent 95% confidence intervals.
