# Supplementary material for: Levofloxacin‐Induced QTc Prolongation Depends on the Time of Drug Administration
Source: PubMed Central journal article supplement — CPT Pharmacometrics Syst Pharmacol. 2016 Aug 1;5(9):466–74. doi: 10.1002/psp4.12085 (PMC5036421; doi:10.1002/psp4.12085), 2016-08-01
Supplement: PSP4-5-466-s004.pdf [file PSP4-5-466-s004.pdf]

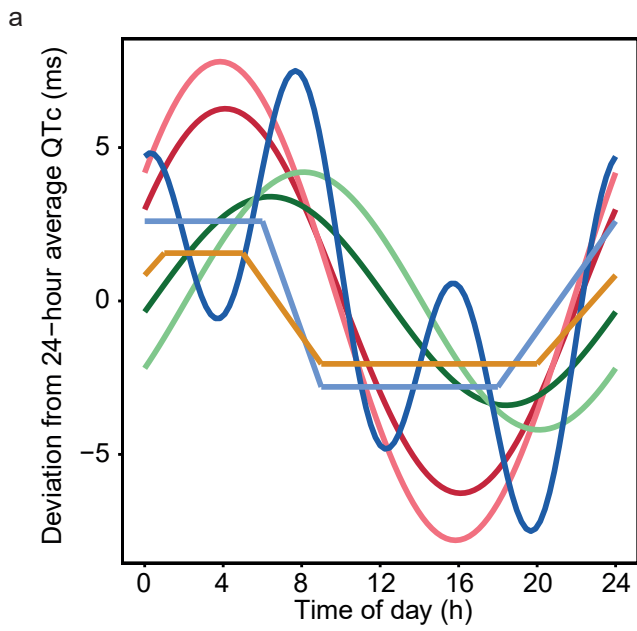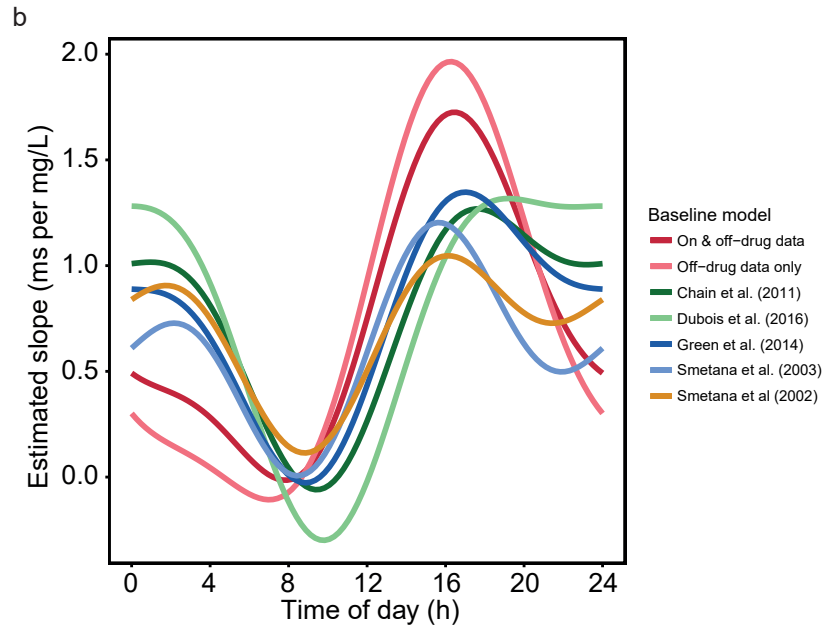

**Supplemental Fig 4** (A) 24-hour variation in baseline QT interval estimated with the full (on- and off-drug) data set (dark red line), with the pre-dose (off-drug) data set only (light red line) and reported in various publications (blue, green and orange lines). (B) Estimated 24-hour variation in concentration-QT relationship using the baseline models shown in panel A.
