# Supplementary material for: Levofloxacin‐Induced QTc Prolongation Depends on the Time of Drug Administration
Source: PubMed Central journal article supplement — CPT Pharmacometrics Syst Pharmacol. 2016 Aug 1;5(9):466–74. doi: 10.1002/psp4.12085 (PMC5036421; doi:10.1002/psp4.12085), 2016-08-01
Supplement: PSP4-5-466-s005.pdf [file PSP4-5-466-s005.pdf]

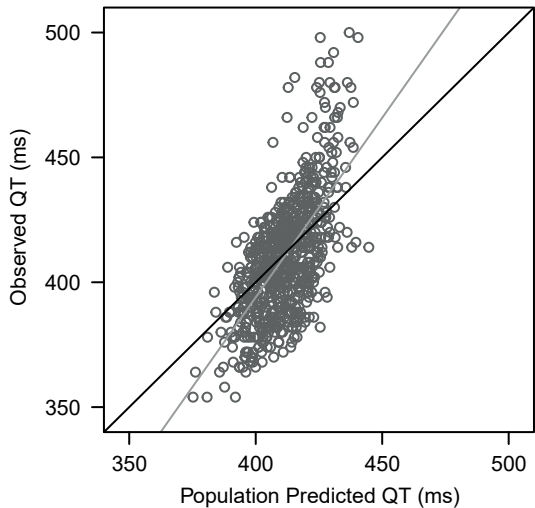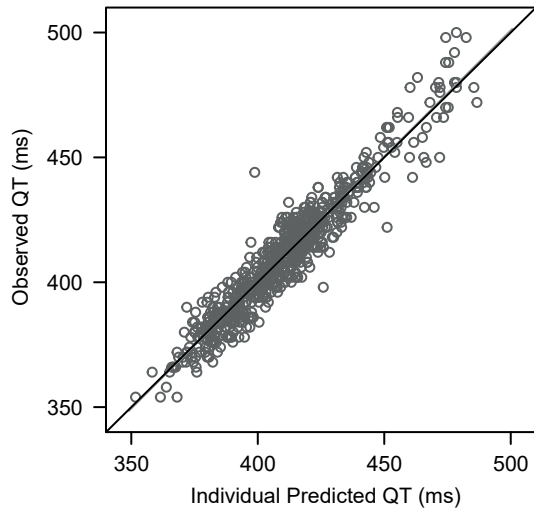

**Supplemental Fig 5** Goodness of fit plots of the final model. Observed versus population (left) and individual (right) predicted QT intervals.
