# Supplementary material for: Levofloxacin‐Induced QTc Prolongation Depends on the Time of Drug Administration
Source: PubMed Central journal article supplement — CPT Pharmacometrics Syst Pharmacol. 2016 Aug 1;5(9):466–74. doi: 10.1002/psp4.12085 (PMC5036421; doi:10.1002/psp4.12085), 2016-08-01
Supplement: PSP4-5-466-s006.pdf [file PSP4-5-466-s006.pdf]

**Supplemental Table 1** Parameter estimates of the baseline QT model

| <b>Parameter</b>                | <b>Estimate (RSE)</b> |
|---------------------------------|-----------------------|
| QT <sub>0</sub> (ms)            | 407 (1.1%)            |
| $\alpha$                        | 0.216 (18%)           |
| A (ms)                          | 7.8 (28%)             |
| $\phi$ (h from midnight)        | 3.84 (22%)            |
| IIV QT <sub>0</sub> (%)         | 3.5% (16%)            |
| IOV QT <sub>0</sub> (%)         | 2.3% (13%)            |
| Proportional residual error (%) | 1.2% (45.2%)          |

QT<sub>0</sub>: intercept of QT-RR relationship;  $\alpha$  correction term for RR interval, A: amplitude of the 24-hour variation in QT;  $\phi$ : acrophase (time of peak) of the 24-hour variation in QT; IIV: interindividual variability; IOV: interoccasion variability; RSE: relative standard error.
